# Supplementary material for: A down converting serine-functionalised NaYF4:Ce3+/Gd3+/Eu3+@NaGdF4:Tb3+ photoluminescent probe for chemical sensing of explosive nitroaromatic compounds
Source: Royal Society of Chemistry journal article supplement (doi:10.1039/d0nj04288a), 2020-01-01
Supplement: d0nj04288a1.pdf [file d0nj04288a1.pdf]

**(Supplementary Information)**

**Down Converting Serine-functionalised NaYF<sub>4</sub>:Ce<sup>3+</sup>/Gd<sup>3+</sup>/Eu<sup>3+</sup>@NaGdF<sub>4</sub>:Tb<sup>3+</sup>**

**Photoluminescent Probe for Chemical Sensing of Explosive Nitroaromatic Compounds**

**Table of Contents**

| <b>CONTENTS</b>                                                                                               | <b>Pages</b>   |
|---------------------------------------------------------------------------------------------------------------|----------------|
| 1. Rietveld refinement plots of NaYF <sub>4</sub> :Ce <sup>3+</sup> /Gd <sup>3+</sup> /Eu <sup>3+</sup> ..... | <b>S2</b>      |
| 2. HR-TEM.....                                                                                                | <b>S3</b>      |
| 3. EDS.....                                                                                                   | <b>S4-S6</b>   |
| 4. FT-IR spectra.....                                                                                         | <b>S7-S8</b>   |
| 5. Life time decay curve.....                                                                                 | <b>S9-S10</b>  |
| 6. quenching efficiency.....                                                                                  | <b>S11</b>     |
| 7. Crystallographic data information (Tables).....                                                            | <b>S12</b>     |
| 8. EDS data Tables.....                                                                                       | <b>S13-S14</b> |

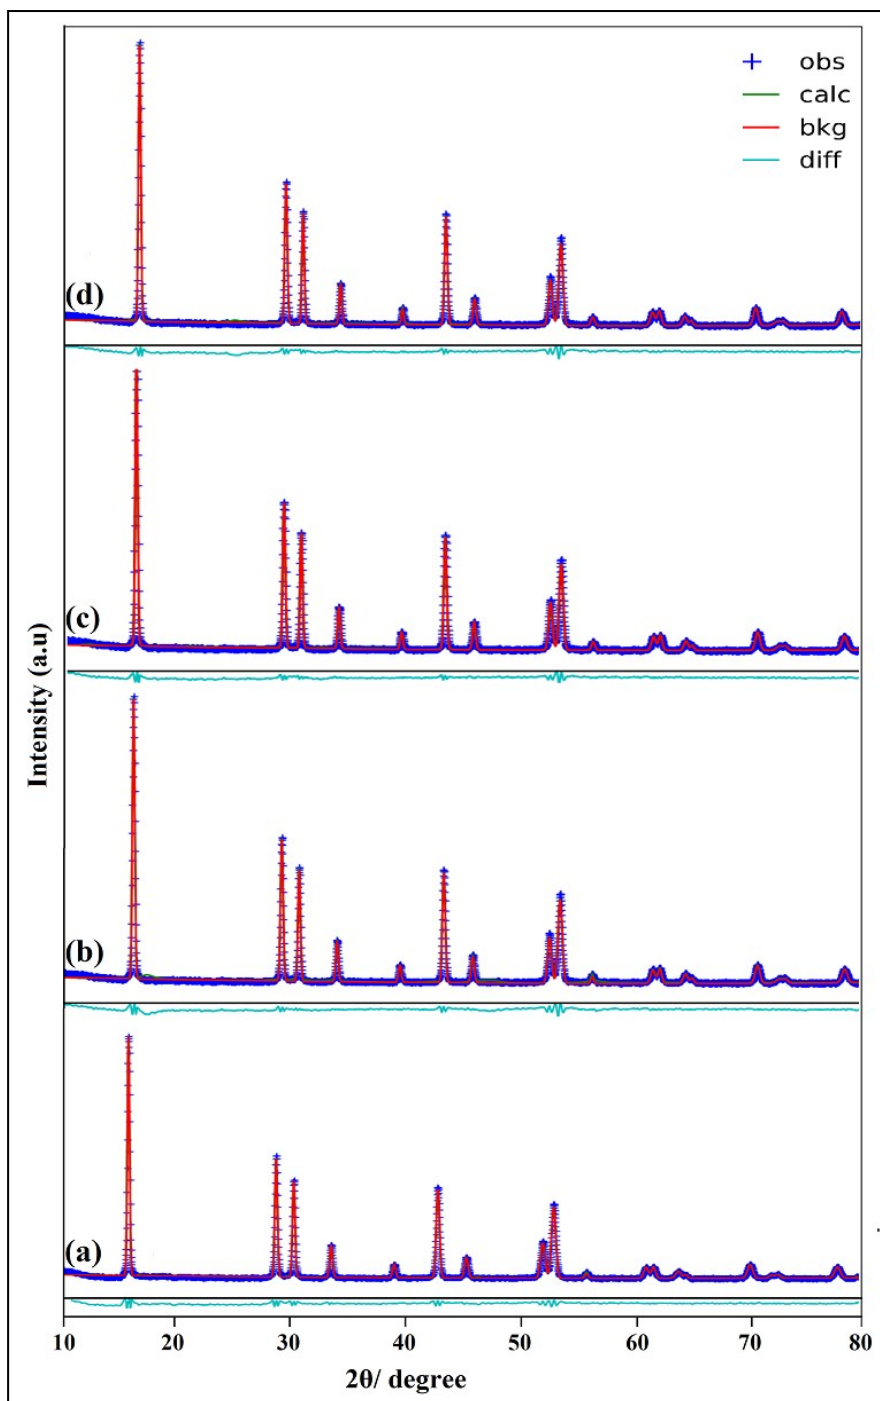

**Fig. S1** Rietveld refinement plots of NaYF<sub>4</sub>:Ce<sup>3+</sup>/Gd<sup>3+</sup>/Eu<sup>3+</sup> nanostructure with different Eu<sup>3+</sup> contents; (a) 10% (b) 15% (c) 20% (d) 25%

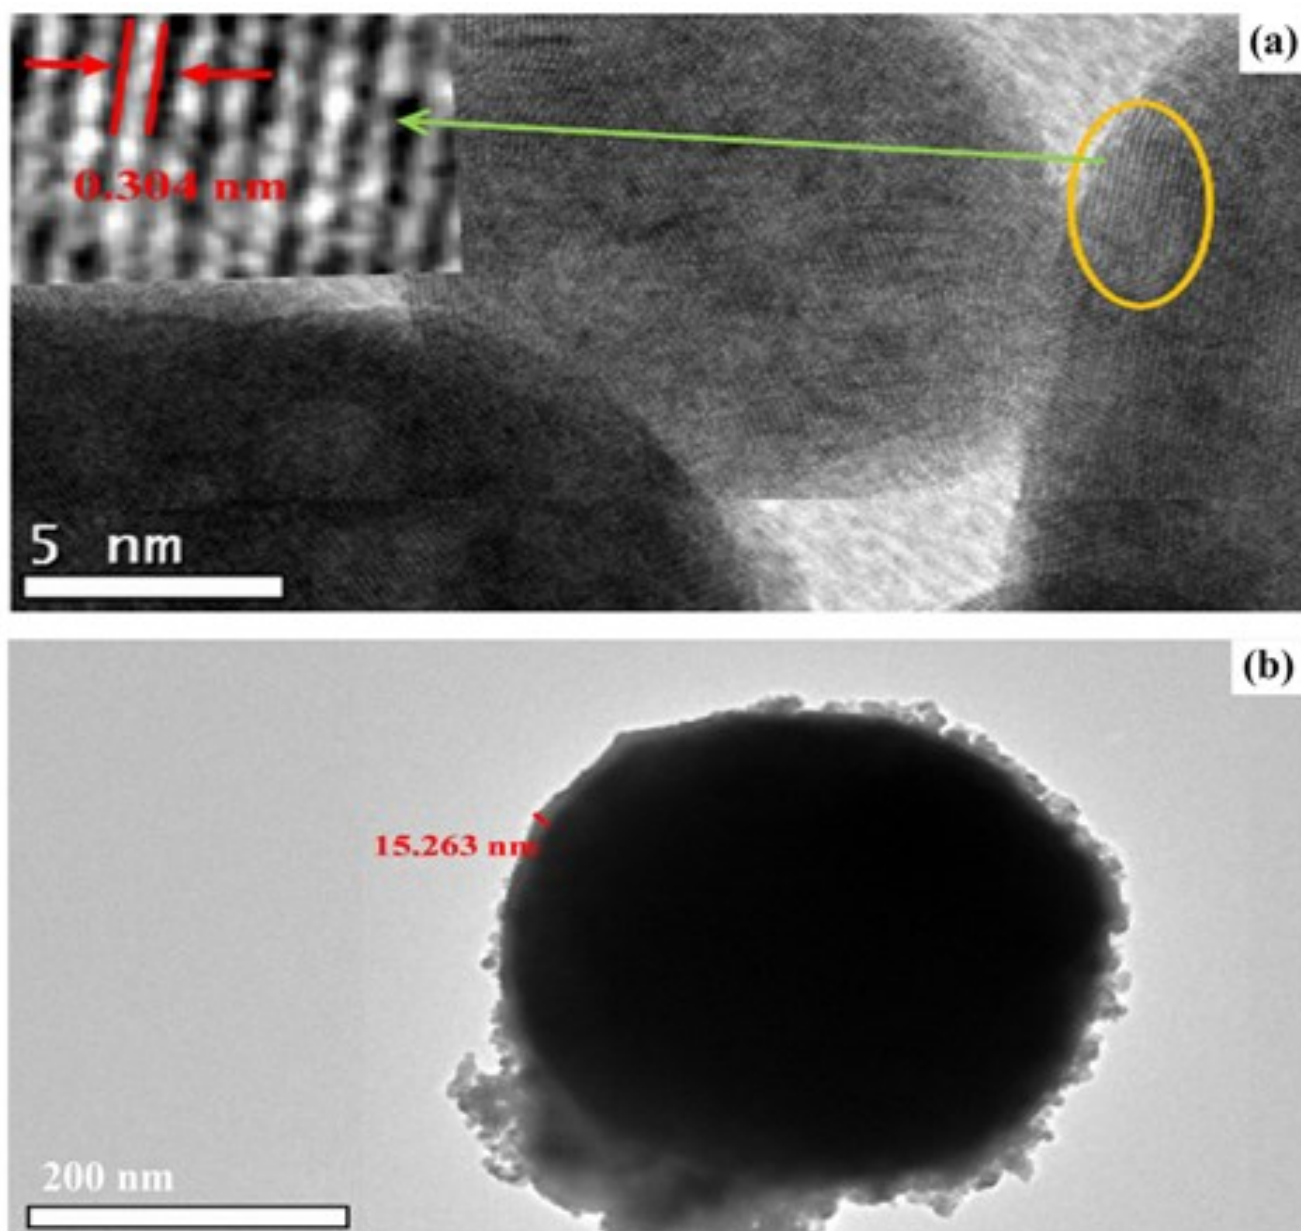

**Fig. S2** (a) HR-TEM image of Serine-functionalised core shell nanocrystal and (b) TEM image of Core shell nanostructure.

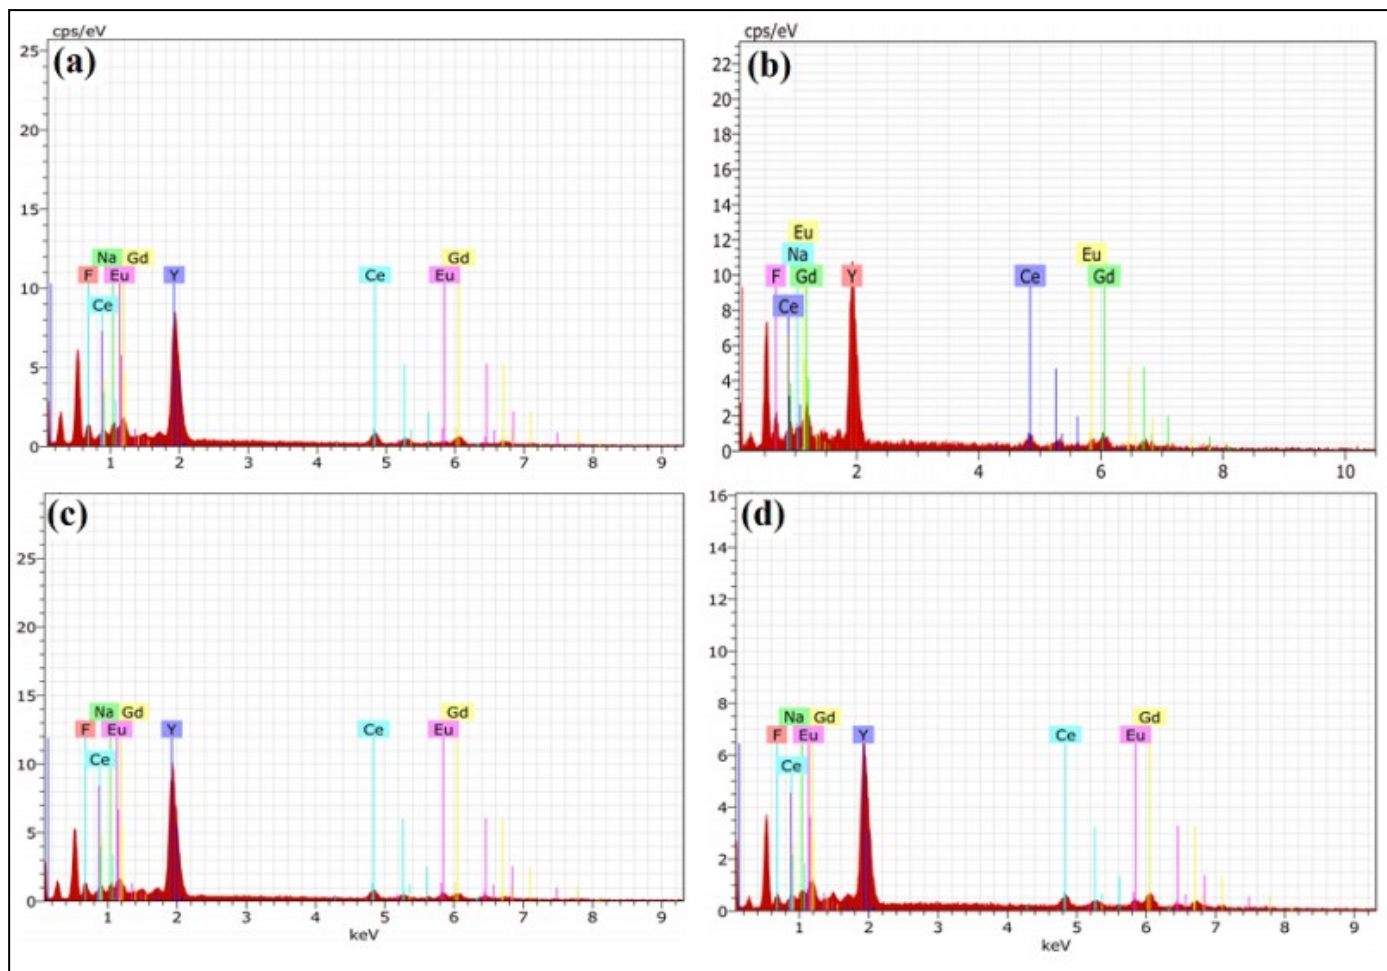

**Fig. S3** EDS spectra of  $\text{NaYF}_4:\text{Ce}^{3+}/\text{Gd}^{3+}/\text{Eu}^{3+}$  nanophosphors with different  $\text{Eu}^{3+}$  contents:

(a) 3% (b) 5% (c) 7% (d) 10%

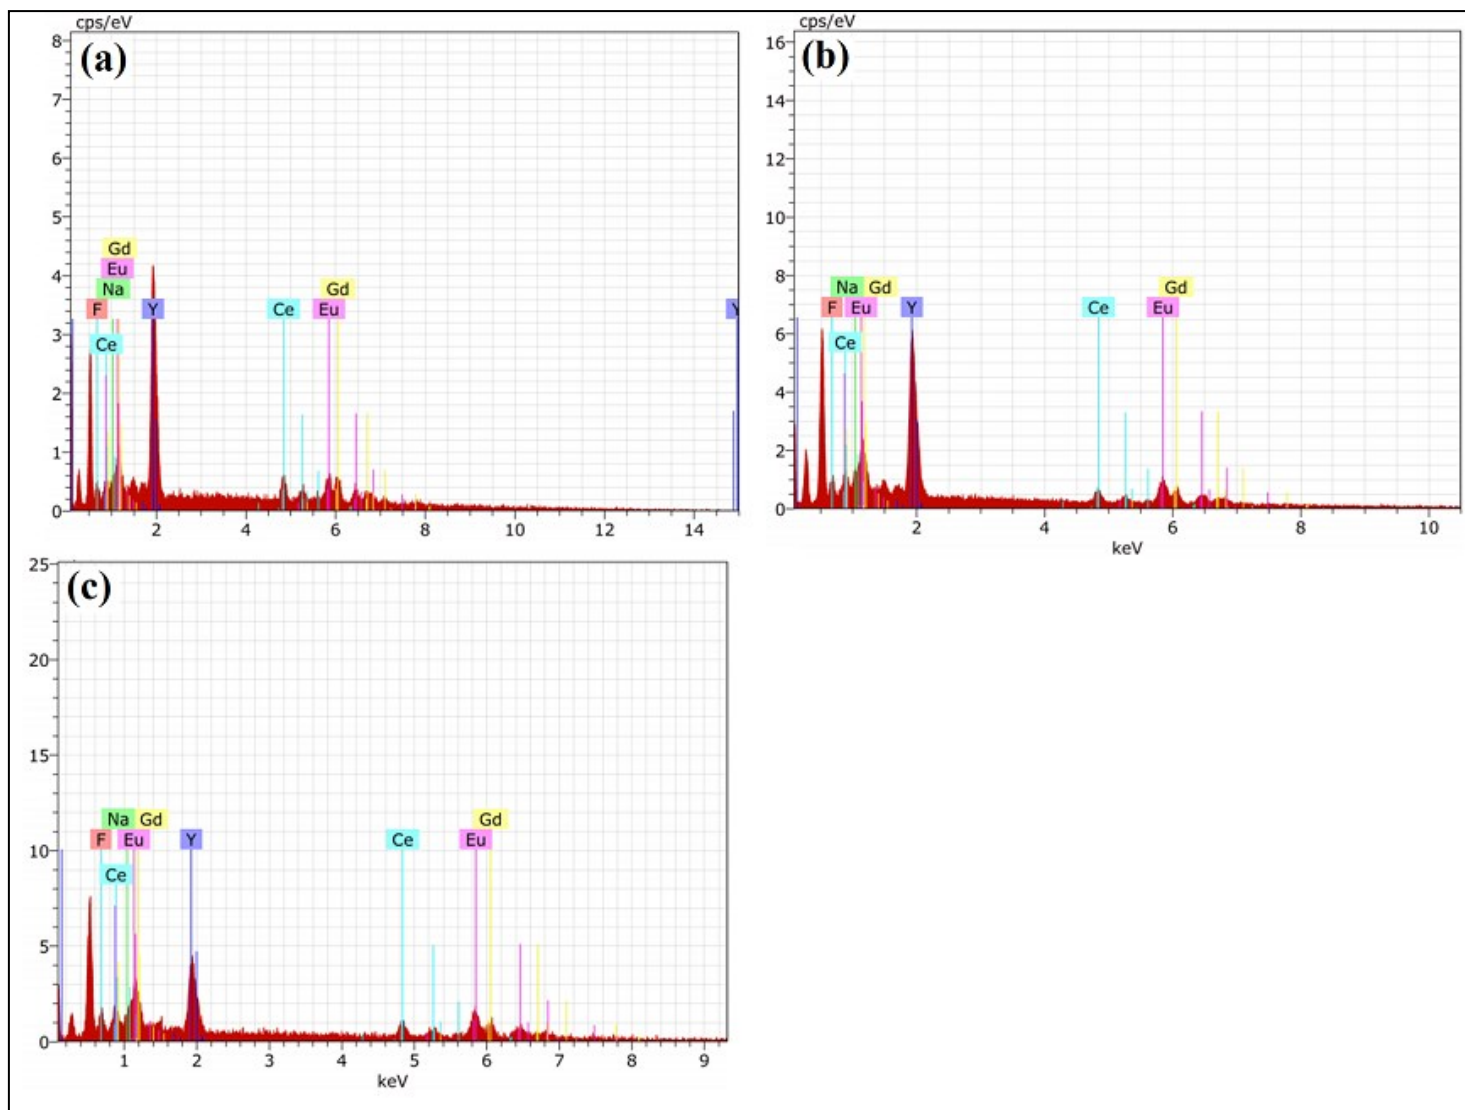

**Fig. S4** EDS spectra of as synthesized  $\text{NaYF}_4:\text{Ce}^{3+}/\text{Gd}^{3+}/\text{Eu}^{3+}$  nanocrystals with different  $\text{Eu}^{3+}$  contents: (a) 15 % (b) 20 % (c) 25%

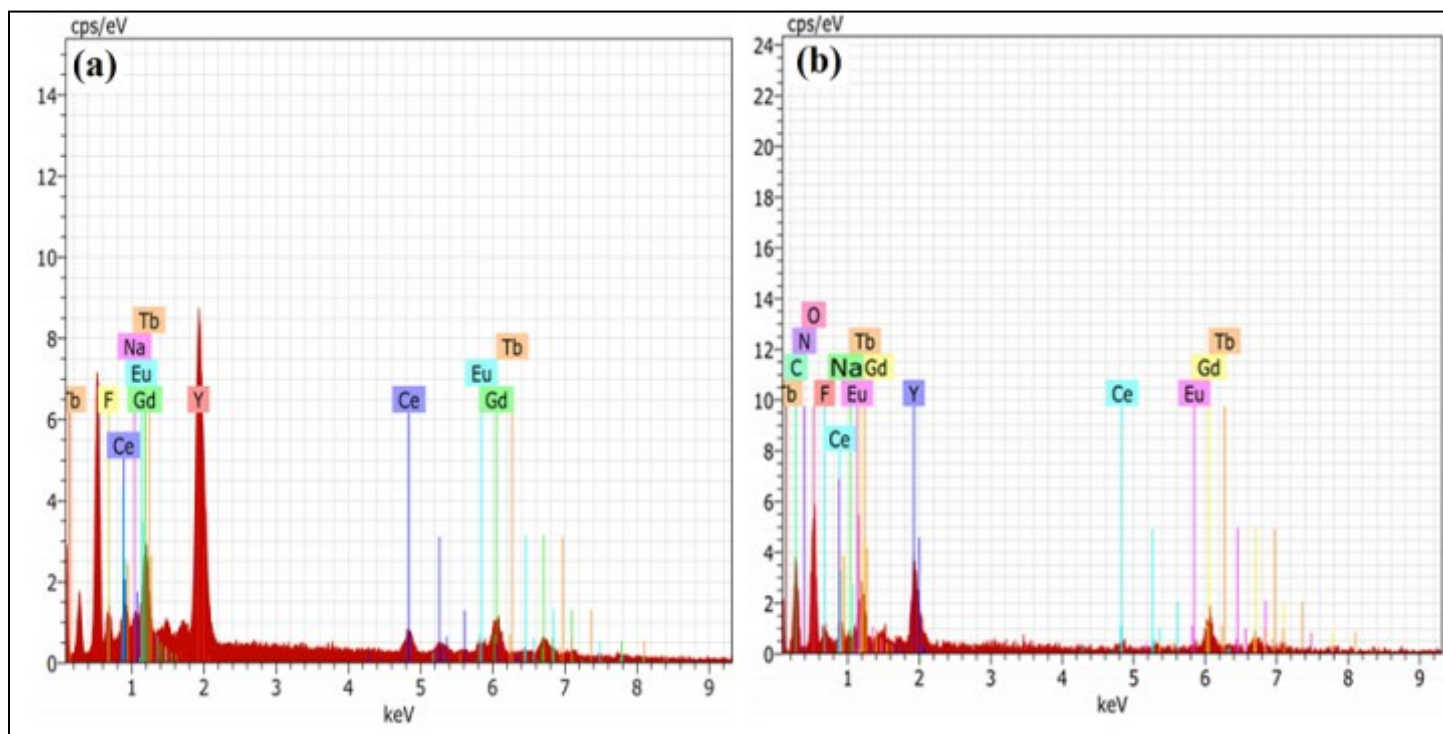

**Fig. S5** EDS spectra of nanophosphors: (a)  $\text{NaYF}_4:\text{Ce}^{3+}/\text{Gd}^{3+}/\text{Eu}^{3+}@/\text{NaGdF}_4:\text{Tb}^{3+}$  core shell

(b) Serine functionalised  $\text{NaYF}_4:\text{Ce}^{3+}/\text{Gd}^{3+}/\text{Eu}^{3+}@/\text{NaGdF}_4:\text{Tb}^{3+}$  core shell

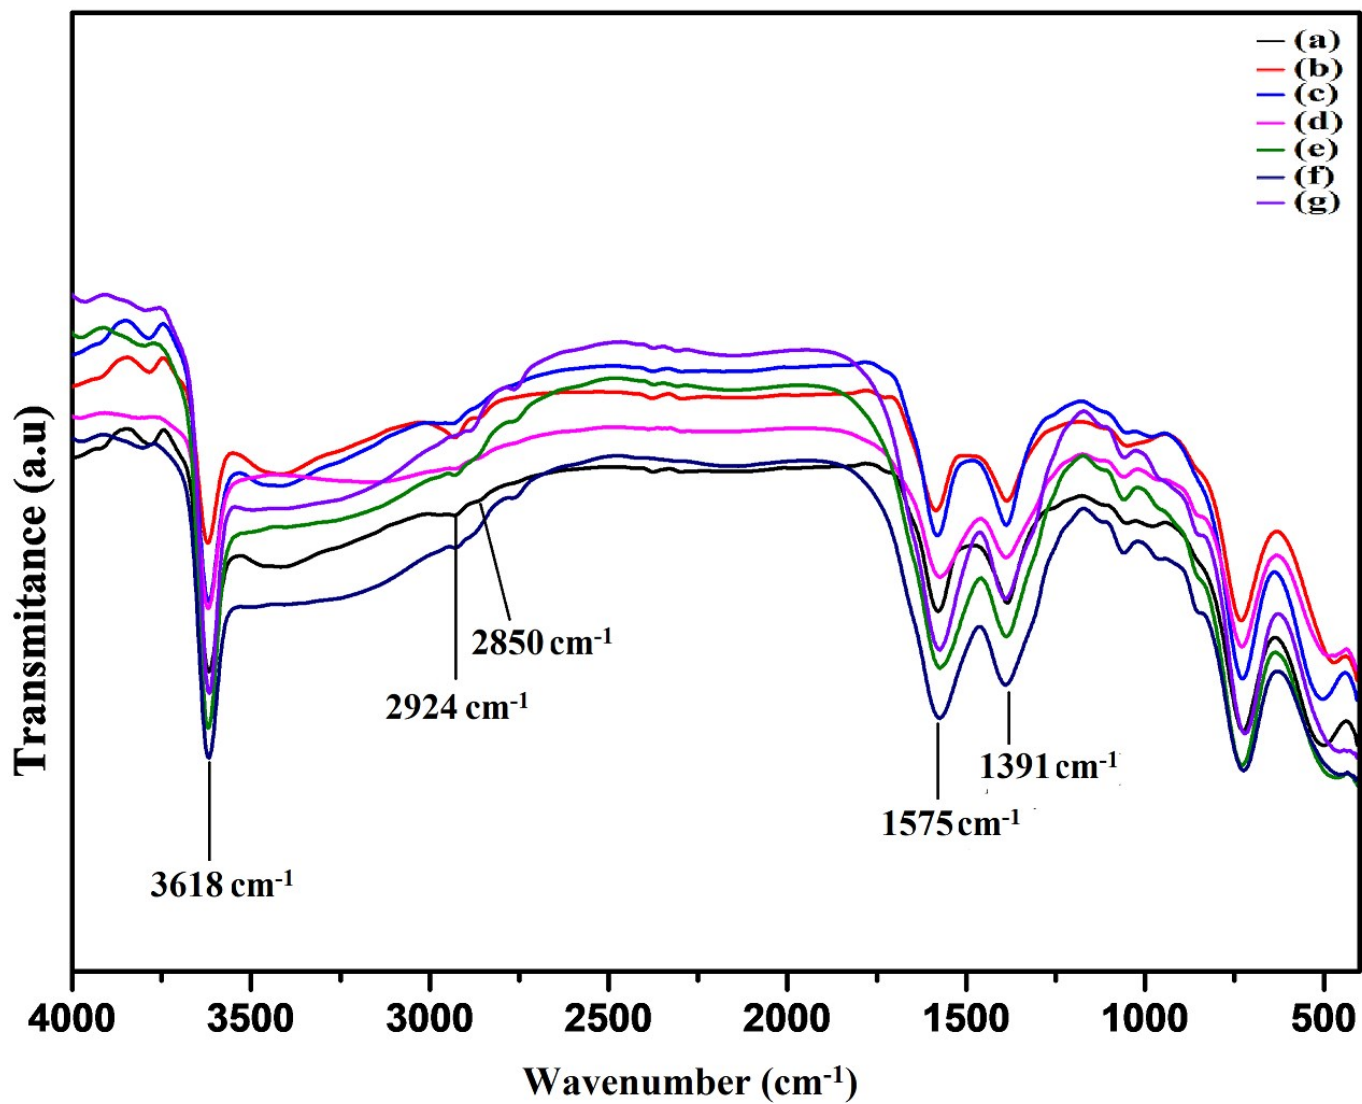

**Fig. S6** FTIR spectra of NaYF<sub>4</sub>:Ce<sup>3+</sup>/Gd<sup>3+</sup>/Eu<sup>3+</sup> with different Eu<sup>3+</sup> contents; (a) 3% (b) 5% (c) 7% (d) 10% (e) 15% (f) 20% (g) 25%

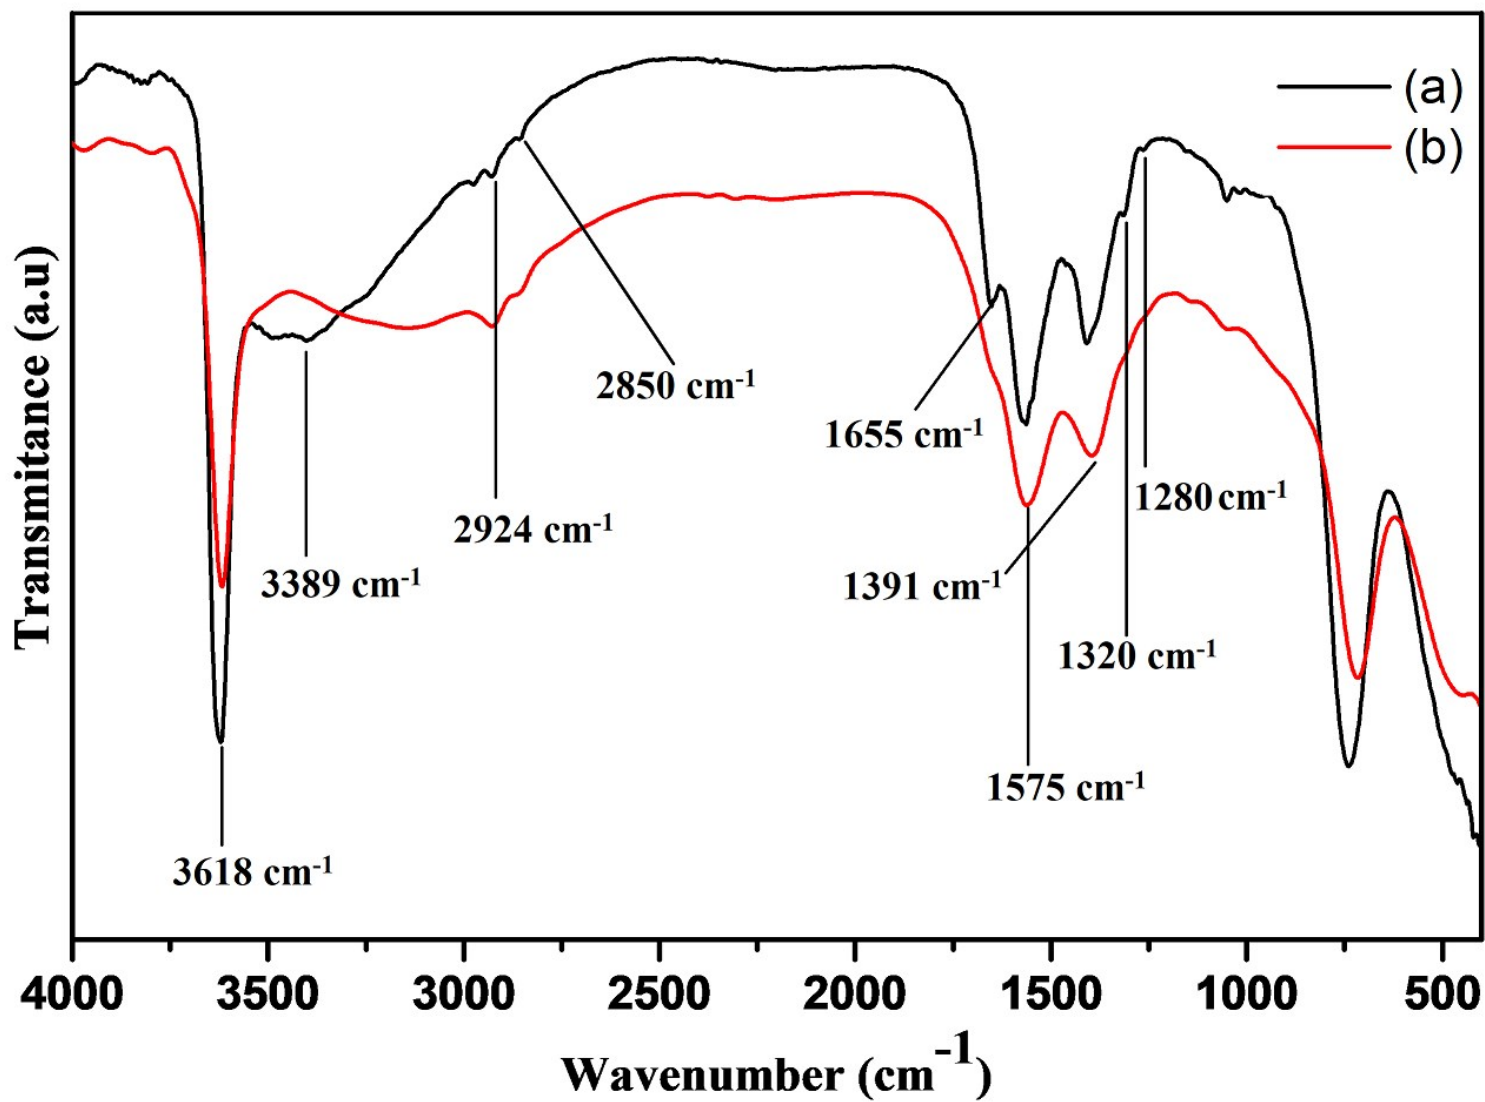

**Fig. S7** FTIR spectra of synthesized nanostructure; (a) core shell (b) Serine-functionalized core shell



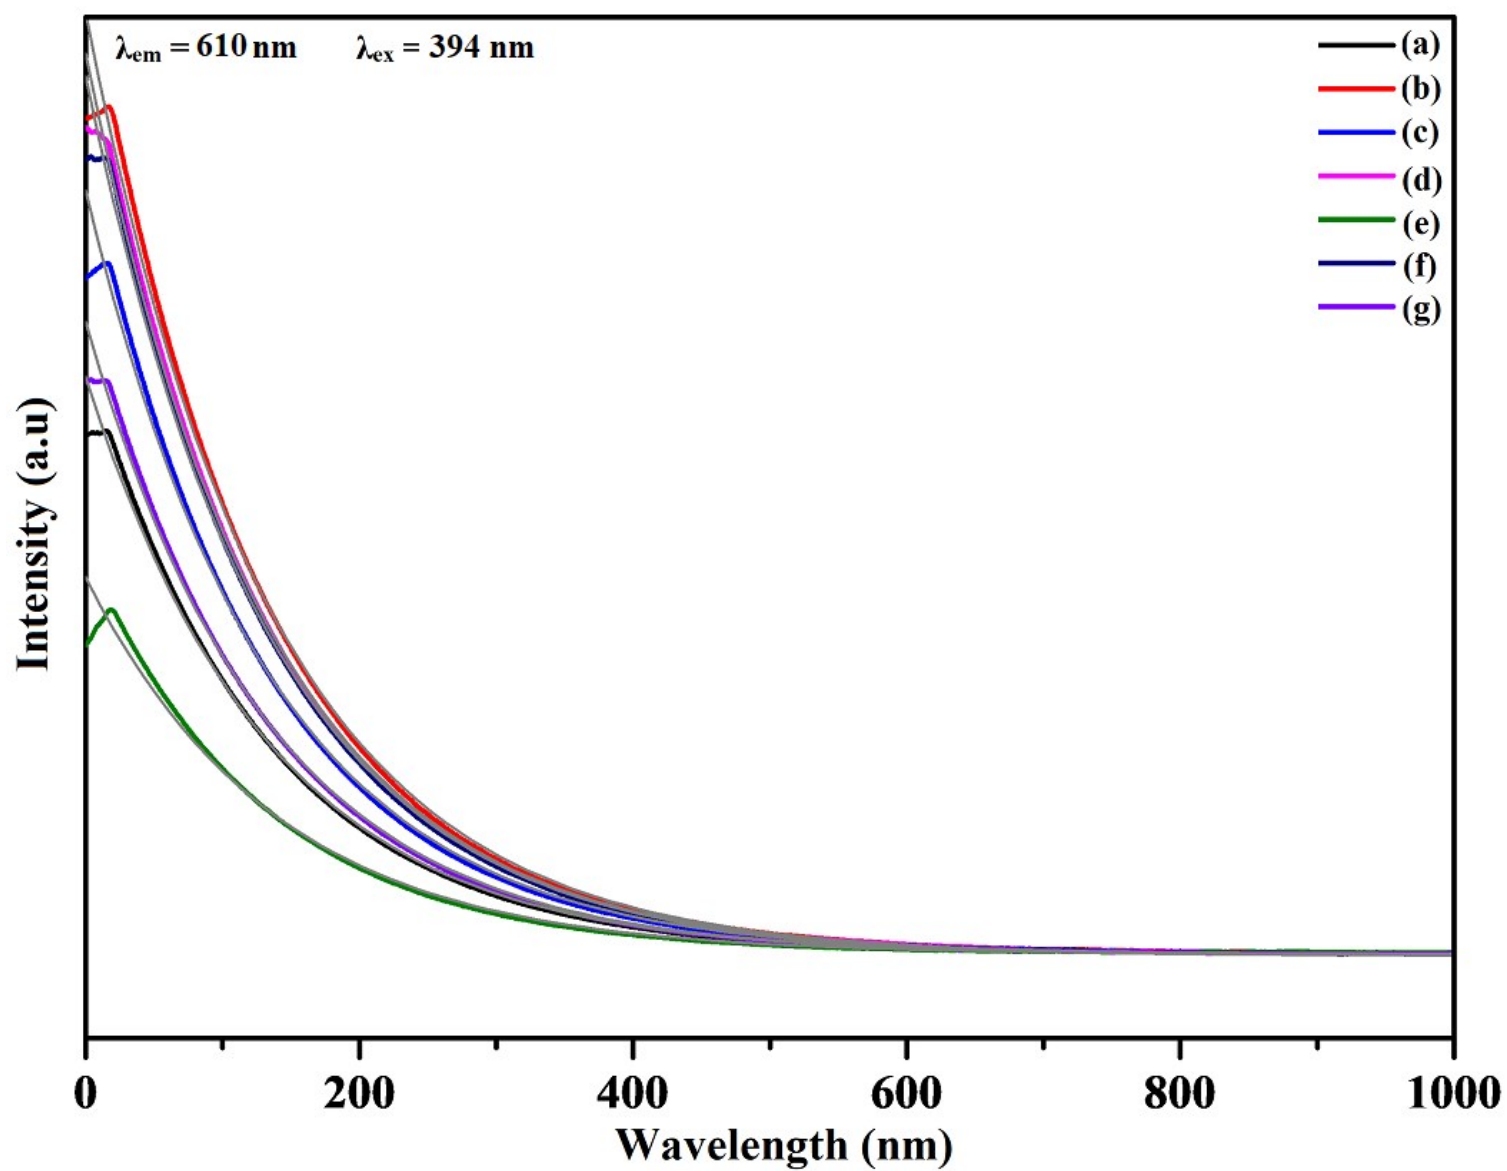

**Fig. S8** Photoluminescence decay curves of NaYF<sub>4</sub>:Ce<sup>3+</sup>/Gd<sup>3+</sup>/Eu<sup>3+</sup> with different Eu<sup>3+</sup> contents; (a) 3% (b) 5% (c) 7% (d) 10% (e) 15% (f) 20% (g) 20%

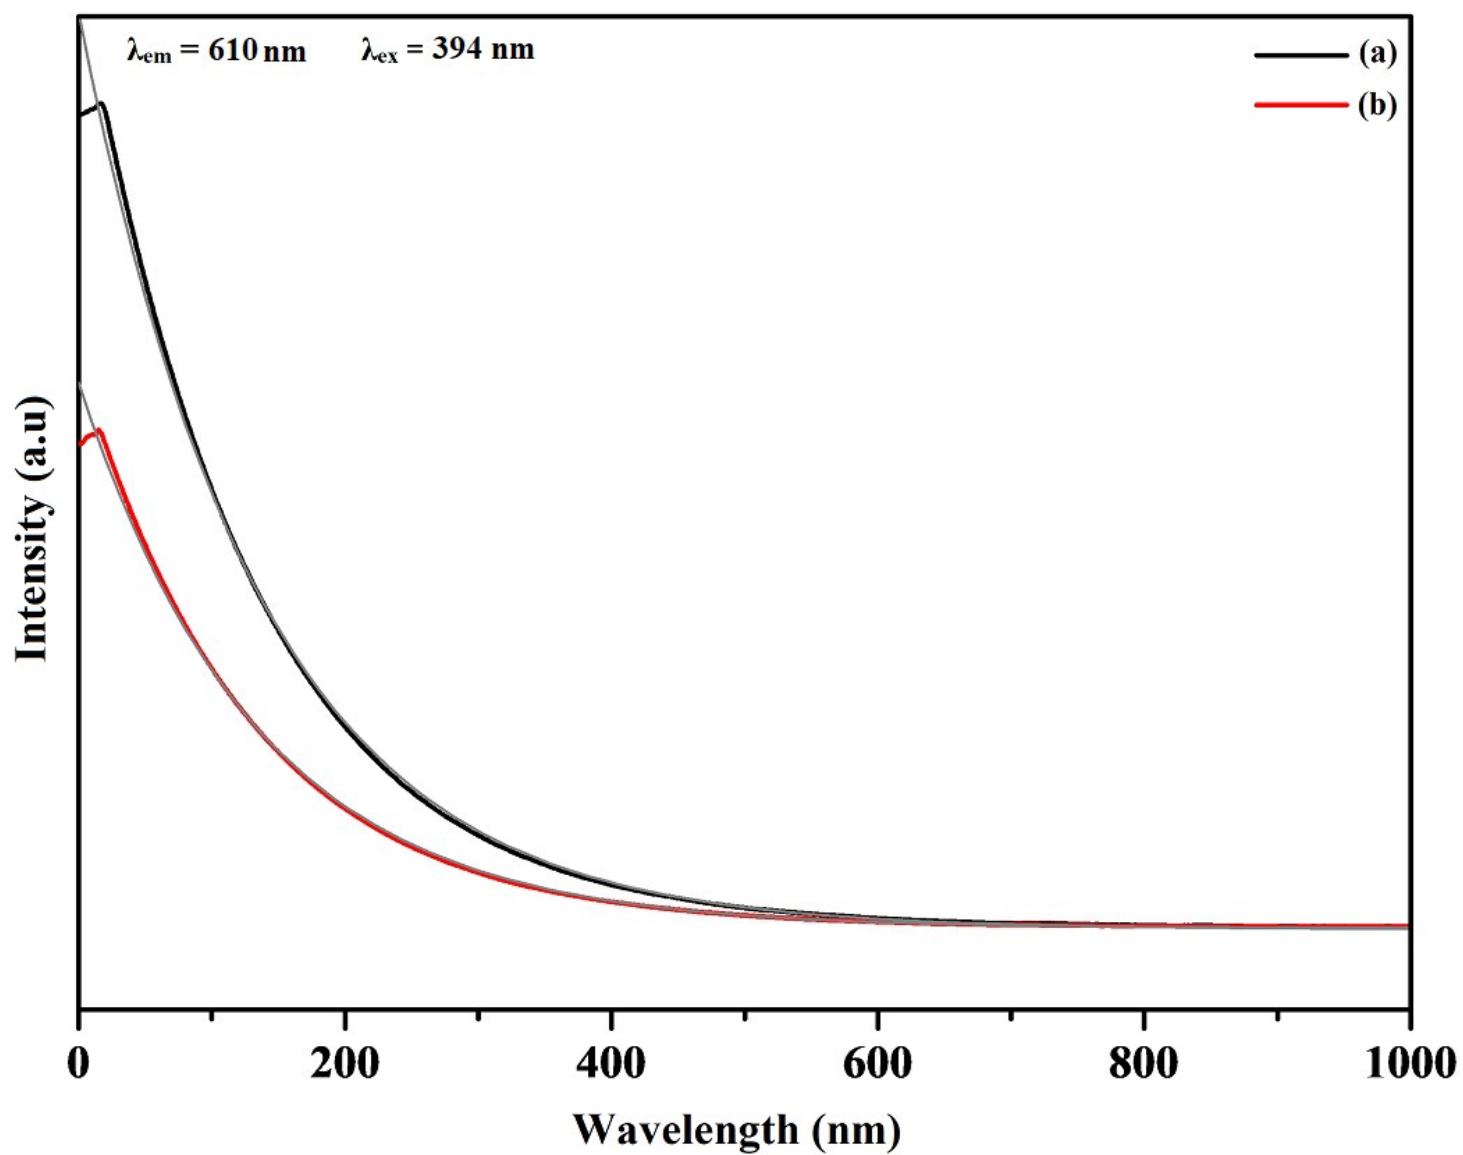

**Fig. S9** Photoluminescence decay curves of nanophosphors; (a) Core shell (b) serine-functionalized core shell nanomaterials.

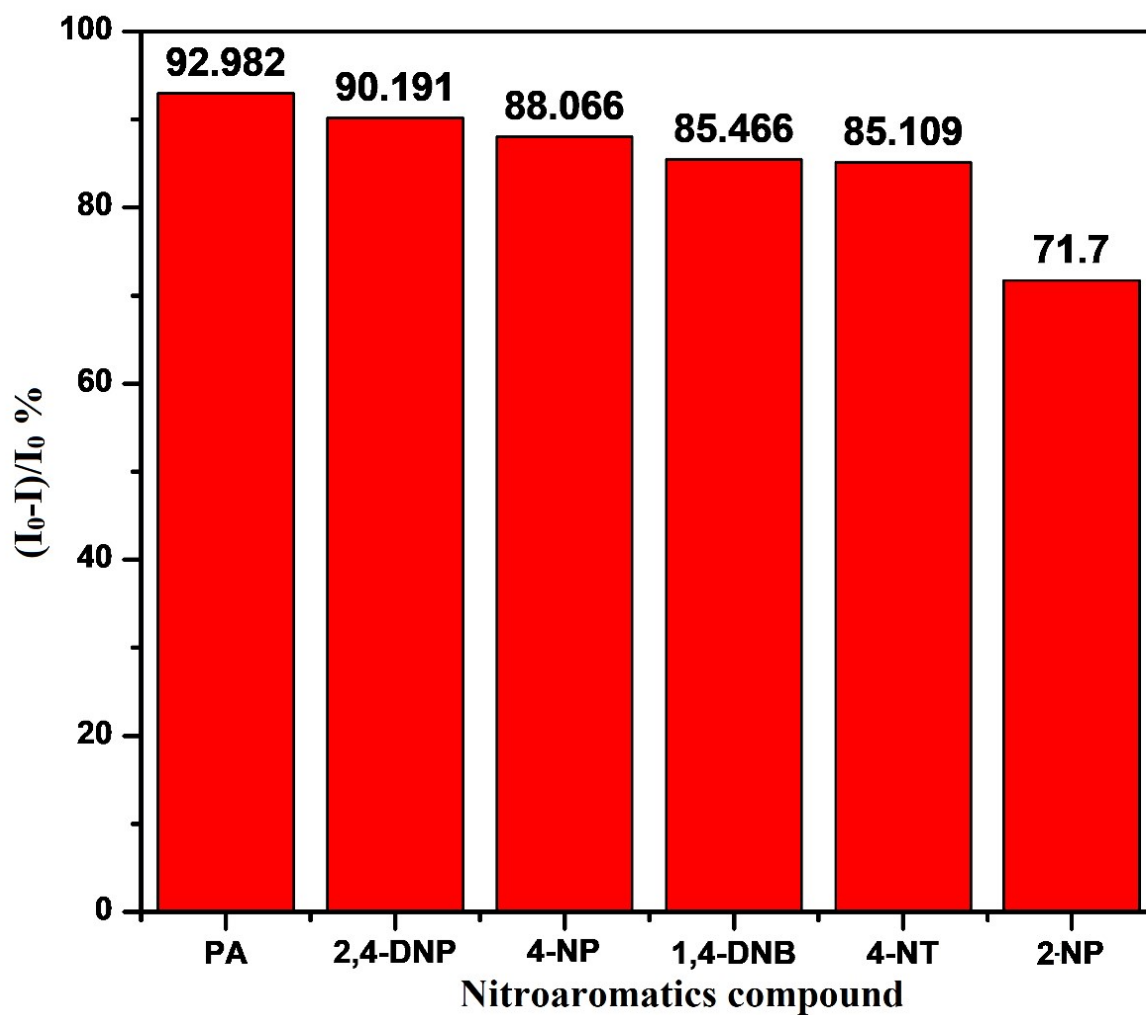

**Fig. S10** Quenching efficiency of the samples containing serine-functionalized  $\text{NaYF}_4:\text{Ce}^{3+}/\text{Gd}^{3+}/\text{Eu}^{3+}@\text{NaGdF}_4:\text{Tb}^{3+}$  core shell and different nitro-compounds (100 ppm) in aqueous sol

**Table S1.** Crystallographic data of hexagonal NaYF<sub>4</sub>:Ce<sup>3+</sup>/Gd<sup>3+</sup>/Eu<sup>3+</sup> nanostructures synthesized with different Eu<sup>3+</sup> contents; 3%, 5%, 7%, 10%, 15%, 20% and 25%.

| Sample              | 3 %       | 5 %       | 7 %       | 10 %      | 15 %      | 20 %      | 25 %      |
|---------------------|-----------|-----------|-----------|-----------|-----------|-----------|-----------|
| Space Group         | P -6      |
| Symmetry            | Hexagonal |
| 2θ interval (°)     | 20-80     | 20-80     | 20-80     | 20-80     | 20-80     | 20-80     | 20-80     |
| Lattice parameters  |           |           |           |           |           |           |           |
| a (Å)               | 5.96236   | 5.87754   | 6.40764   | 11.14293  | 6.09353   | 5.88150   | 9.38186   |
| b (Å)               | 5.96236   | 5.87754   | 6.40764   | 11.14293  | 6.09353   | 5.88150   | 9.38186   |
| c (Å)               | 3.06273   | 3.70879   | 3.59470   | 2.95871   | 3.50211   | 3.15020   | 3.25801   |
| V (Å <sup>3</sup> ) | 94.292    | 110.957   | 127.817   | 318.150   | 112.615   | 94.372    | 248.348   |
| R <sub>w</sub>      | 4.98%     | 4.59%     | 4.62%     | 5.01%     | 4.23%     | 5.00%     | 4.49%     |

**Table S2** Atomic and Weight % of elements present in NaYF<sub>4</sub>:Ce<sup>3+</sup>/Gd<sup>3+</sup>/Eu<sup>3+</sup> with different Eu<sup>3+</sup> contents

| Elements          | Eu <sup>3+</sup> 3 % |       | Eu <sup>3+</sup> 5 % |       | Eu <sup>3+</sup> 7 % |      | Eu <sup>3+</sup> 10 % |      | Eu <sup>3+</sup> 15 % |      | Eu <sup>3+</sup> 20 % |      | Eu <sup>3+</sup> 25 % |      |
|-------------------|----------------------|-------|----------------------|-------|----------------------|------|-----------------------|------|-----------------------|------|-----------------------|------|-----------------------|------|
|                   | W%                   | At%   | Wt %                 | At%   | Wt %                 | At % | Wt %                  | At % | Wt %                  | At % | Wt %                  | At % | Wt %                  | At % |
| <b>Yttrium</b>    | 55.7                 | 48.94 | 55.02                | 49.83 | 58.6                 | 53.1 | 52.74                 | 55.9 | 42.49                 | 49.9 | 42.37                 | 42.6 | 25.98                 | 28.3 |
|                   | 7                    |       |                      |       | 9                    | 2    |                       | 9    |                       | 5    |                       | 4    |                       | 3    |
| <b>Gadolinium</b> | 16.2                 | 8.08  | 19.74                | 10.11 | 11.8                 | 6.04 | 22.14                 | 13.2 | 21.49                 | 14.2 | 15.84                 | 9.01 | 17.91                 | 11.0 |
|                   | 8                    |       |                      |       | 0                    |      |                       | 9    |                       | 8    |                       |      |                       | 4    |
| <b>Europium</b>   | 4.87                 | 2.50  | 7.83                 | 4.15  | 11.1                 | 5.92 | 10.12                 | 6.28 | 21.14                 | 14.5 | 27.53                 | 16.2 | 38.24                 | 24.3 |
|                   |                      |       |                      |       | 8                    |      |                       |      |                       | 4    |                       | 0    |                       | 9    |
| <b>Cerium</b>     | 2.50                 | 8.14  | 9.96                 | 5.72  | 11.2                 | 6.46 | 11.39                 | 7.67 | 12.60                 | 9.40 | 8.15                  | 5.20 | 12.01                 | 8.31 |
|                   |                      |       |                      |       | 5                    |      |                       |      |                       |      |                       |      |                       |      |
| <b>Sodium</b>     | 3.40                 | 11.53 | 1.91                 | 6.68  | 2.10                 | 7.36 | 1.37                  | 5.61 | 0.75                  | 3.40 | 2.21                  | 8.60 | 2.25                  | 9.50 |
| <b>Fluorine</b>   | 5.07                 | 20.82 | 5.55                 | 23.51 | 4.98                 | 21.1 | 2.25                  | 11.1 | 1.53                  | 8.43 | 3.90                  | 18.3 | 3.61                  | 18.4 |
|                   |                      |       |                      |       |                      | 0    |                       | 6    |                       |      |                       | 4    |                       | 3    |

**Table S3** Atomic and Weight (%) of elements present in core shell and Serine functionalised core shell nanostructure

| <b>Elements</b>   | <b>Core shell</b> |            | <b>Serine functionalized core shell</b> |            |
|-------------------|-------------------|------------|-----------------------------------------|------------|
|                   | <b>Wt%</b>        | <b>At%</b> | <b>Wt%</b>                              | <b>At%</b> |
| <b>Yttrium</b>    | 48.53             | 49.30      | 12.07                                   | 3.56       |
| <b>Gadolinium</b> | 27.99             | 16.08      | 29.98                                   | 5.00       |
| <b>Europium</b>   | 7.96              | 4.73       | 2.04                                    | 0.35       |
| <b>Terbium</b>    | 1.29              | 0.73       | 4.71                                    | 0.78       |
| <b>Cerium</b>     | 9.08              | 5.86       | 3.02                                    | 0.56       |
| <b>Sodium</b>     | 1.38              | 5.44       | 0.22                                    | 0.25       |
| <b>Fluorine</b>   | 3.76              | 17.86      | 2.67                                    | 3.68       |
| <b>Carbon</b>     |                   |            | 20.65                                   | 45.07      |
| <b>Nitrogen</b>   |                   |            | 1.53                                    | 2.87       |
| <b>Oxygen</b>     |                   |            | 23.11                                   | 37.87      |
